# Supplementary material
Source: JCI journal article supplement (doi:10.1172/jci.insight.188078)
Supplement: sd5 [file 5]

**Supplemental Table S1. Cell types isolated in single nuclei RNA-seq - percent (number of nuclei)**

| Sample       | Blastema    | Epithelial | Interstitial |
|--------------|-------------|------------|--------------|
| Tumor 1 (T1) | 87% (7041)  | 9% (723)   | 4% (284)     |
| Tumor 2 (T2) | 79% (5879)  | 18% (1314) | 3% (202)     |
| Tumor 3 (T3) | 65% (6086)  | 17% (1555) | 19% (1775)   |
| Tumor 4 (T4) | 53% (3794 ) | 39% (2781) | 8% (561)     |
| Tumor 5 (T5) | 81% (5820)  | 5% (335)   | 14% (1002)   |
| Tumor 6 (T6) | 48% (4454)  | 41% (3816) | 11% (1024)   |
| Tumor 7 (T7) | 91% (8911)  | 8% (806)   | 1% (105)     |
| Tumor 8 (T8) | 74% (4915)  | 23% (1504) | 3% (212)     |
| Tumor 9 (T9) | 87% (3791)  | 4% (167)   | 9% (378)     |

**Supplemental Table S2. Cell type by histological classification - percent**

| Sample       | Blastema | Epithelial | Interstitial |
|--------------|----------|------------|--------------|
| Tumor 1 (T1) | 5%       | 5%         | 90%          |
| Tumor 2 (T2) | 80%      | 5%         | 15%          |
| Tumor 3 (T3) | 90%      | 6%         | 4%           |
| Tumor 4 (T4) | 1%       | 90%        | 9%           |
| Tumor 5 (T5) | 25%      | 25%        | 50%          |
| Tumor 6 (T6) | 40%      | 35%        | 25%          |
| Tumor 7 (T7) | 95%      | 1%         | 4%           |
| Tumor 8 (T8) | 65%      | 30%        | 5%           |
| Tumor 9 (T9) | 60%      | 5%         | 35%          |
